# Supplementary material for: Migraine Characteristics, Comorbidities, Healthcare Resource Utilization, and Associated Costs of Early Users of Erenumab in the USA: A Retrospective Cohort Study Using Administrative Claims Data
Source: PubMed Central journal article supplement — Pain Ther. 2021 Sep 17;10(2):1551–66. doi: 10.1007/s40122-021-00319-z (PMC8586283; doi:10.1007/s40122-021-00319-z), 2021-09-17
Supplement: 40122_2021_319_MOESM1_ESM.pdf [file 40122_2021_319_MOESM1_ESM.pdf]

Supplemental Table 1. Selected baseline comorbidities and migraine characteristics by provider specialty

|                                               | All patients<br>N = 9753 | Provider specialty      |                                       |
|-----------------------------------------------|--------------------------|-------------------------|---------------------------------------|
|                                               |                          | Neurologist<br>N = 7067 | Primary care <sup>a</sup><br>N = 1387 |
| Comorbidities, n (%)                          |                          |                         |                                       |
| Asthma                                        | 727 (7.5)                | 560 (7.9)               | 75 (5.4)                              |
| Hypertension                                  | 1790 (18.4)              | 1323 (18.7)             | 215 (15.5)                            |
| Acute myocardial infarction                   | 37 (0.4)                 | 24 (0.3)                | 5 (0.4)                               |
| Ischemic stroke                               | 77 (0.8)                 | 69 (1.0)                | 3 (0.2)                               |
| Constipation                                  | 306 (3.1)                | 244 (3.5)               | 17 (1.2)                              |
| Irritable bowel syndrome                      | 232 (2.4)                | 185 (2.6)               | 21 (1.5)                              |
| Complications of constipation                 | 187 (1.9)                | 141 (2.0)               | 8 (0.6)                               |
| Anxiety                                       | 2125 (21.8)              | 1589 (22.5)             | 260 (18.7)                            |
| Depression                                    | 1606 (16.5)              | 1212 (17.2)             | 193 (13.9)                            |
| Other (non-migraine) headaches                | 2829 (29.0)              | 2277 (32.2)             | 264 (19.0)                            |
| Low back pain                                 | 1511 (15.5)              | 1144 (16.2)             | 132 (9.5)                             |
| Osteoarthritis/spondylosis                    | 1411 (14.5)              | 1085 (15.4)             | 105 (7.6)                             |
| Fibromyalgia                                  | 549 (5.6)                | 430 (6.1)               | 48 (3.5)                              |
| No comorbidities                              |                          |                         |                                       |
| Migraine characteristics                      |                          |                         |                                       |
| Migraine with aura, including persistent aura | 2611 (26.8)              | 1937 (27.4)             | 361 (26.0)                            |
| Migraine with aura, excluding persistent aura | 2530 (25.9)              | 1878 (26.6)             | 347 (25.0)                            |
| Chronic migraine                              | 6274 (64.3)              | 5009 (70.9)             | 559 (40.3)                            |
| Menstrual migraine                            | 259 (2.7)                | 195 (2.8)               | 35 (2.5)                              |
| Status migrainosus                            | 2607 (26.7)              | 2053 (29.1)             | 288 (20.8)                            |

<sup>a</sup>Family practice/internal medicine physician and no neurologist or pain specialist/anesthesiologist
